# Supplementary material for: A Facile Synthesis of Novel Amorphous TiO2 Nanorods Decorated rGO Hybrid Composites with Wide Band Microwave Absorption
Source: PubMed Central journal article supplement (PMC7692450; doi:10.3390/nano10112141), 2020-10-27
Supplement: nanomaterials-10-02141-s001.pdf [file nanomaterials-10-02141-s001.pdf]

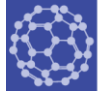

Supporting Information

# Facile Synthesis of Novel Amorphous TiO<sub>2</sub> Nanorods Decorated rGO Hybrid Composites with Wide Band Microwave Absorption

Hao Zhang <sup>1</sup>, Yongpeng Zhao <sup>1,2</sup>, Xuan Yang <sup>3</sup>, Guolin Zhao <sup>4</sup>, Dongmei Zhang <sup>1</sup>, Hui Huang <sup>1</sup>, Shuaitao Yang <sup>1</sup>, Ningxuan Wen <sup>1</sup>, Zeng Fan <sup>1</sup> and Lujun Pan <sup>1\*</sup>.

<sup>1</sup> School of Physics, Dalian University of Technology, Dalian, Liaoning 116024, China.

<sup>2</sup> School of Microelectronics, Dalian University of Technology, Dalian, Liaoning 116024, China.

<sup>3</sup> School of Materials Science and Engineering, Dalian University of Technology, Dalian, Liaoning 116024, China.

<sup>4</sup> School of Physics and Astronomy, Shanghai Jiao Tong University, Shanghai 200240, China.

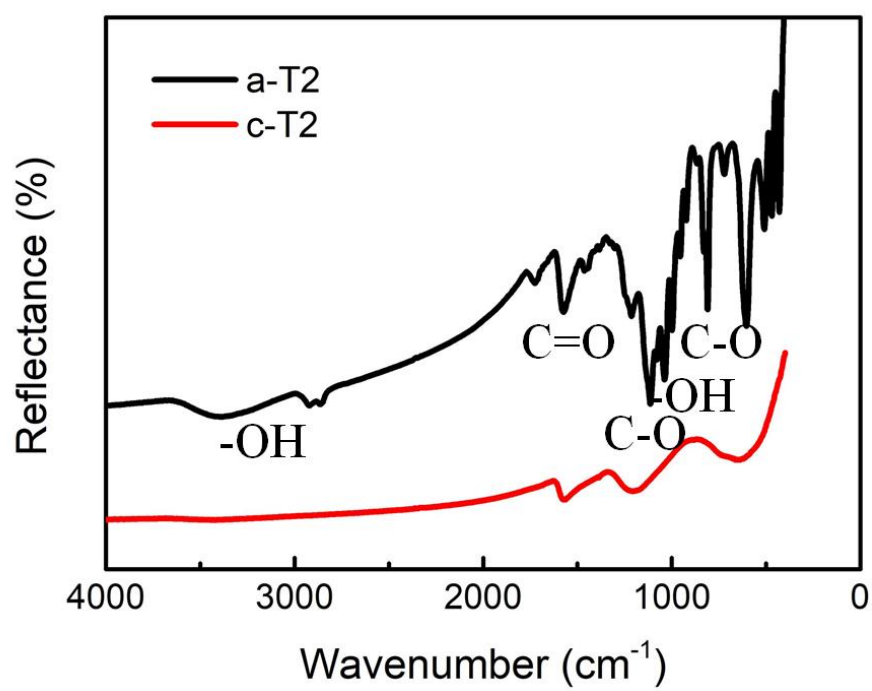

Figure S1. FTIR spectra of a-T2 and c-T2.

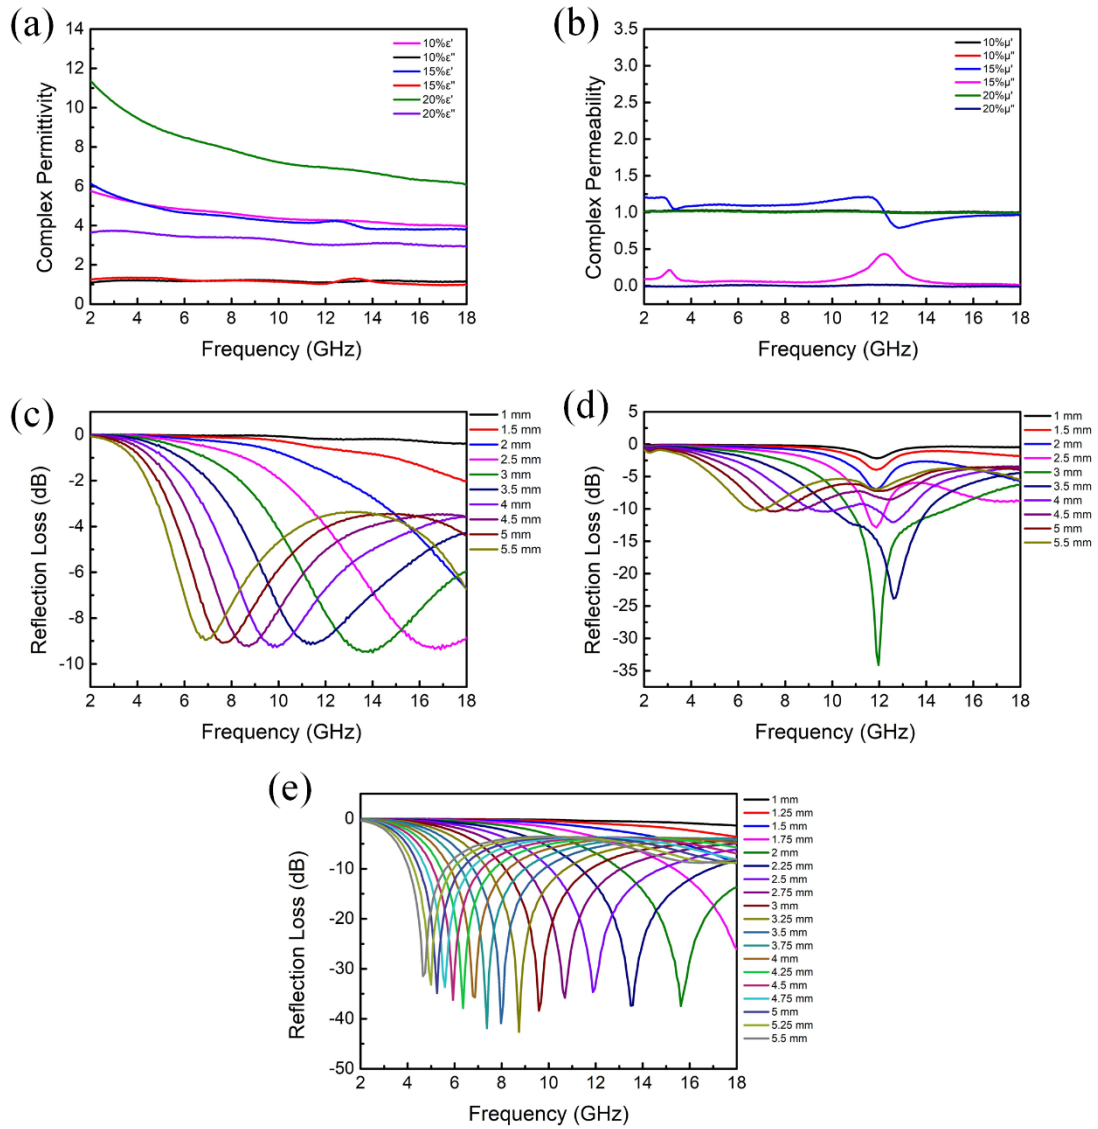

**Figure S2.** (a) Complex permittivity and (b) permeability of a-T2 with filler loading ratio of 10wt%, 15wt% and 20wt%. (c, d, e) Frequency-dependent reflection loss curve of a-T2 with filler loading ratio of 10wt%, 15wt% and 20wt%.

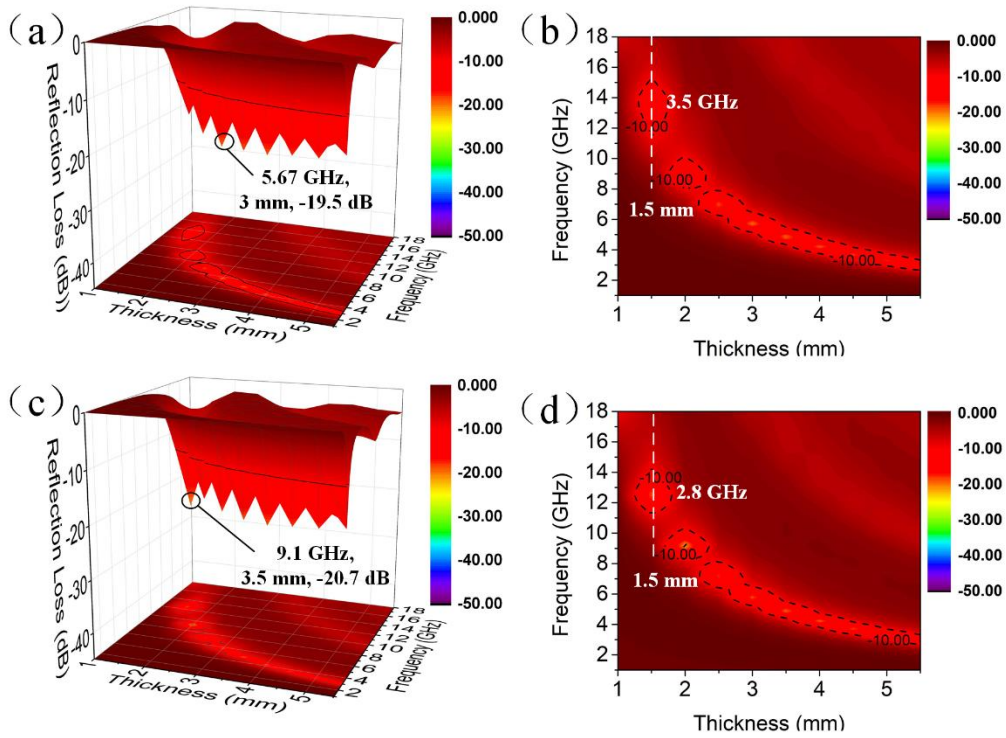

**Figure S3.** 3D RL and 3D projection plots of (a, b) c-T1 and (c, d) c-T2.

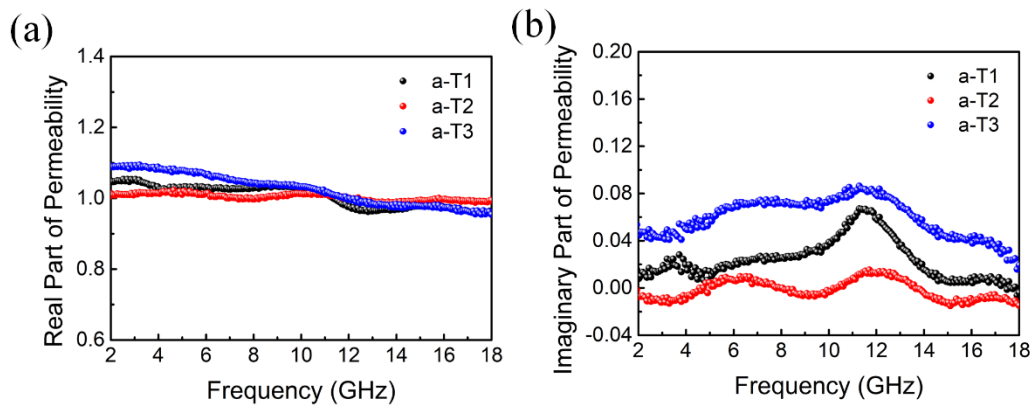

**Figure S4.** Complex permeability of a-T2 and c-T2: (a) real permeability, (b) imaginary permeability at 2-18 GHz.

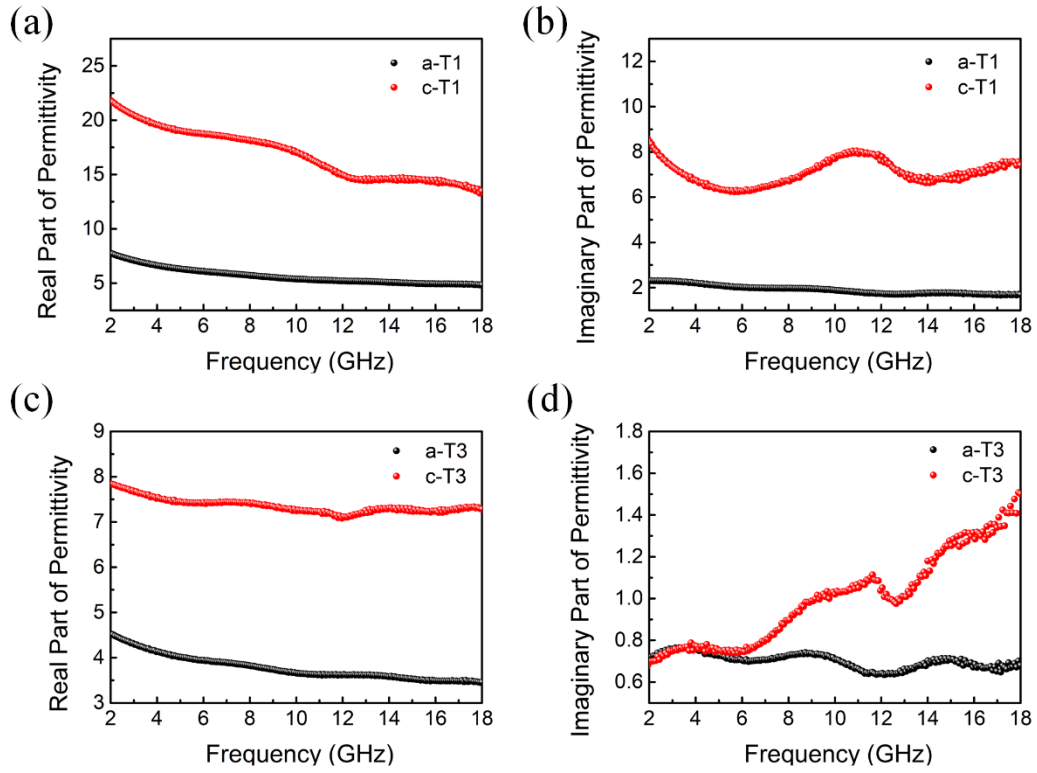

**Figure S5.** (a) Real permittivity and (b) imaginary permittivity of a-T1 and c-T12-18 GHz; (c) real permittivity and (d) imaginary permittivity of a-T3 and c-T3 at 2-18 GHz.

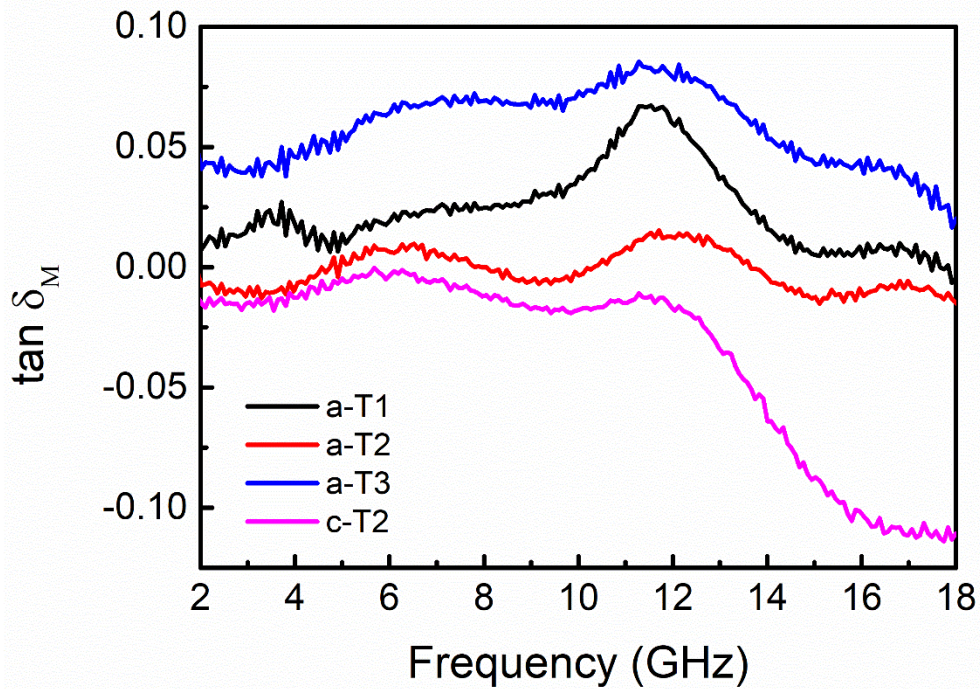

**Figure S6.** Magnetic dissipation factor ( $\tan \delta_M$ ) of a-T1, a-T2, a-T3 and c-T2.

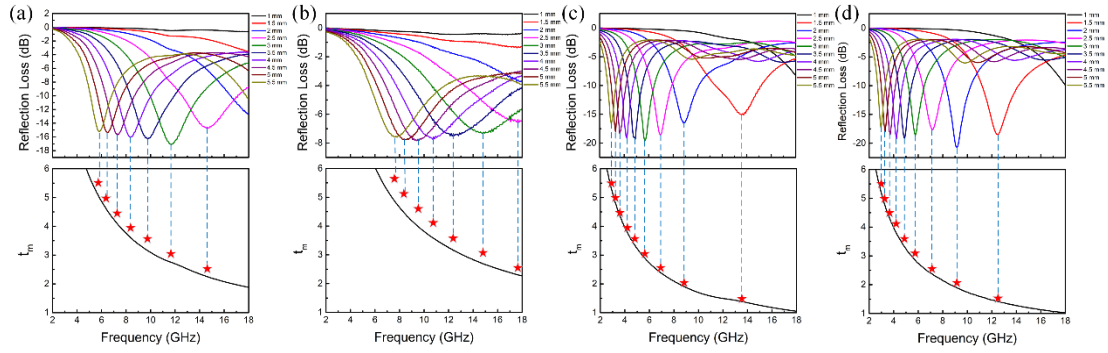

**Figure S7.** Frequency dependence of RL curves and the calculated matching thickness versus peak frequency of (a) a-T1, (b) a-T3, (c) c-T1 and (d) c-T2.

**Table S1.** Different composites based on carbon materials for microwave absorption in recent researches.

| Absorbers                                                            | Matrix        | Loading ratio (wt%) | Thickness (mm) | RL <sub>min</sub> (dB) | Effective absorption bandwidth (GHz) | refs      |
|----------------------------------------------------------------------|---------------|---------------------|----------------|------------------------|--------------------------------------|-----------|
| CNT/TiO <sub>2</sub> sponge                                          | Paraffin      | 30                  | 2              | -31.8                  | 2.76                                 | [46]      |
| TiO <sub>2</sub> /Co/CNFs                                            | Paraffin      | 20                  | 3.5            | -50                    | 5.2                                  | [59]      |
| Fe <sub>3</sub> O <sub>4</sub> @SiO <sub>2</sub> /rGO nanocomposites | Paraffin      | 50                  | 1.5            | -26.4                  | 2.6                                  | [65]      |
| B-TiO <sub>2</sub> /C                                                | Paraffin      | 50                  | 1.5            | -73.2                  | 6.8                                  | [61]      |
| TiO <sub>2</sub> /EG                                                 | Epoxy         | 30                  | 1.4            | -33.9                  | 2.7                                  | [62]      |
| SiO <sub>2</sub> @TiO <sub>2</sub> nanoparticle                      | Paraffin      | 50                  | 3              | -35.2                  | 2.5                                  | [60]      |
| SCFs@TiO <sub>2</sub>                                                | Paraffin      | 30                  | 1              | -46.3                  | 2.4                                  | [64]      |
| NiFe@C@GO                                                            | Silicon resin | 30                  | 2.8            | -51                    | 4.55                                 | [66]      |
| Fe <sub>3</sub> O <sub>4</sub> @LAS/rGO                              | Paraffin      | 50                  | 2.1            | -65                    | 4                                    | [63]      |
| Amorphous TiO <sub>2</sub> /rGO composites                           | Paraffin      | 20                  | 3.25           | -42.8                  | 6.2                                  | This work |
